# Supplementary material
Source: HighWire-hosted journal article supplement (https://cmaj.ca/highwire/filestream/76177/field_highwire_adjunct_files/0/200879-res-1-at.pdf)

**Appendix 1 (as submitted by the authors): Supplementary Figure 1: Heart rhythm abnormalities in COVID-19 patients.**

Panel A: A representative ECG of prolonged QTc (509ms) in a patient treated with QT-prolonging drugs (arbidol and moxifloxacin). Later this patient died of Torsade de Pointes and VF.

Panel B: A representative ECG with normal QTc (389ms) in a patient treated without QT-prolonging drugs.

## Supplementary Figure 1

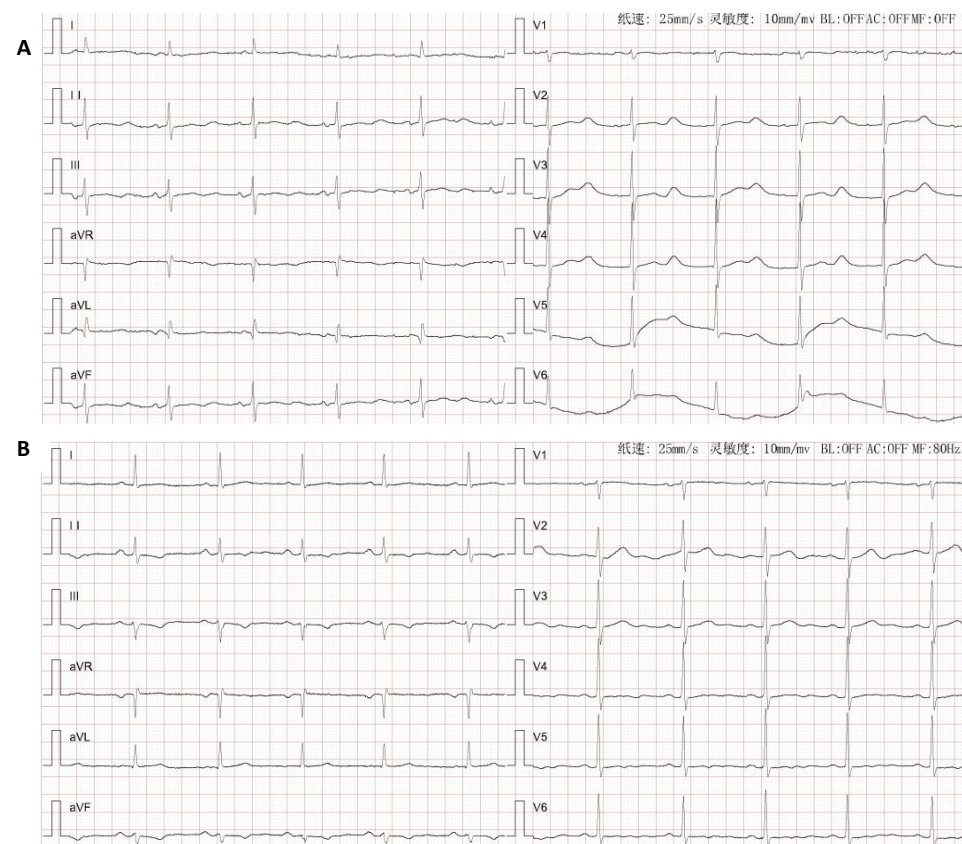

Supplement: 200879-res-1-at.pdf [file 200879-res-1-at.pdf]
